# Supplementary material
Source: PubMed Central journal article supplement (PMC10851328)

**Figure S1**

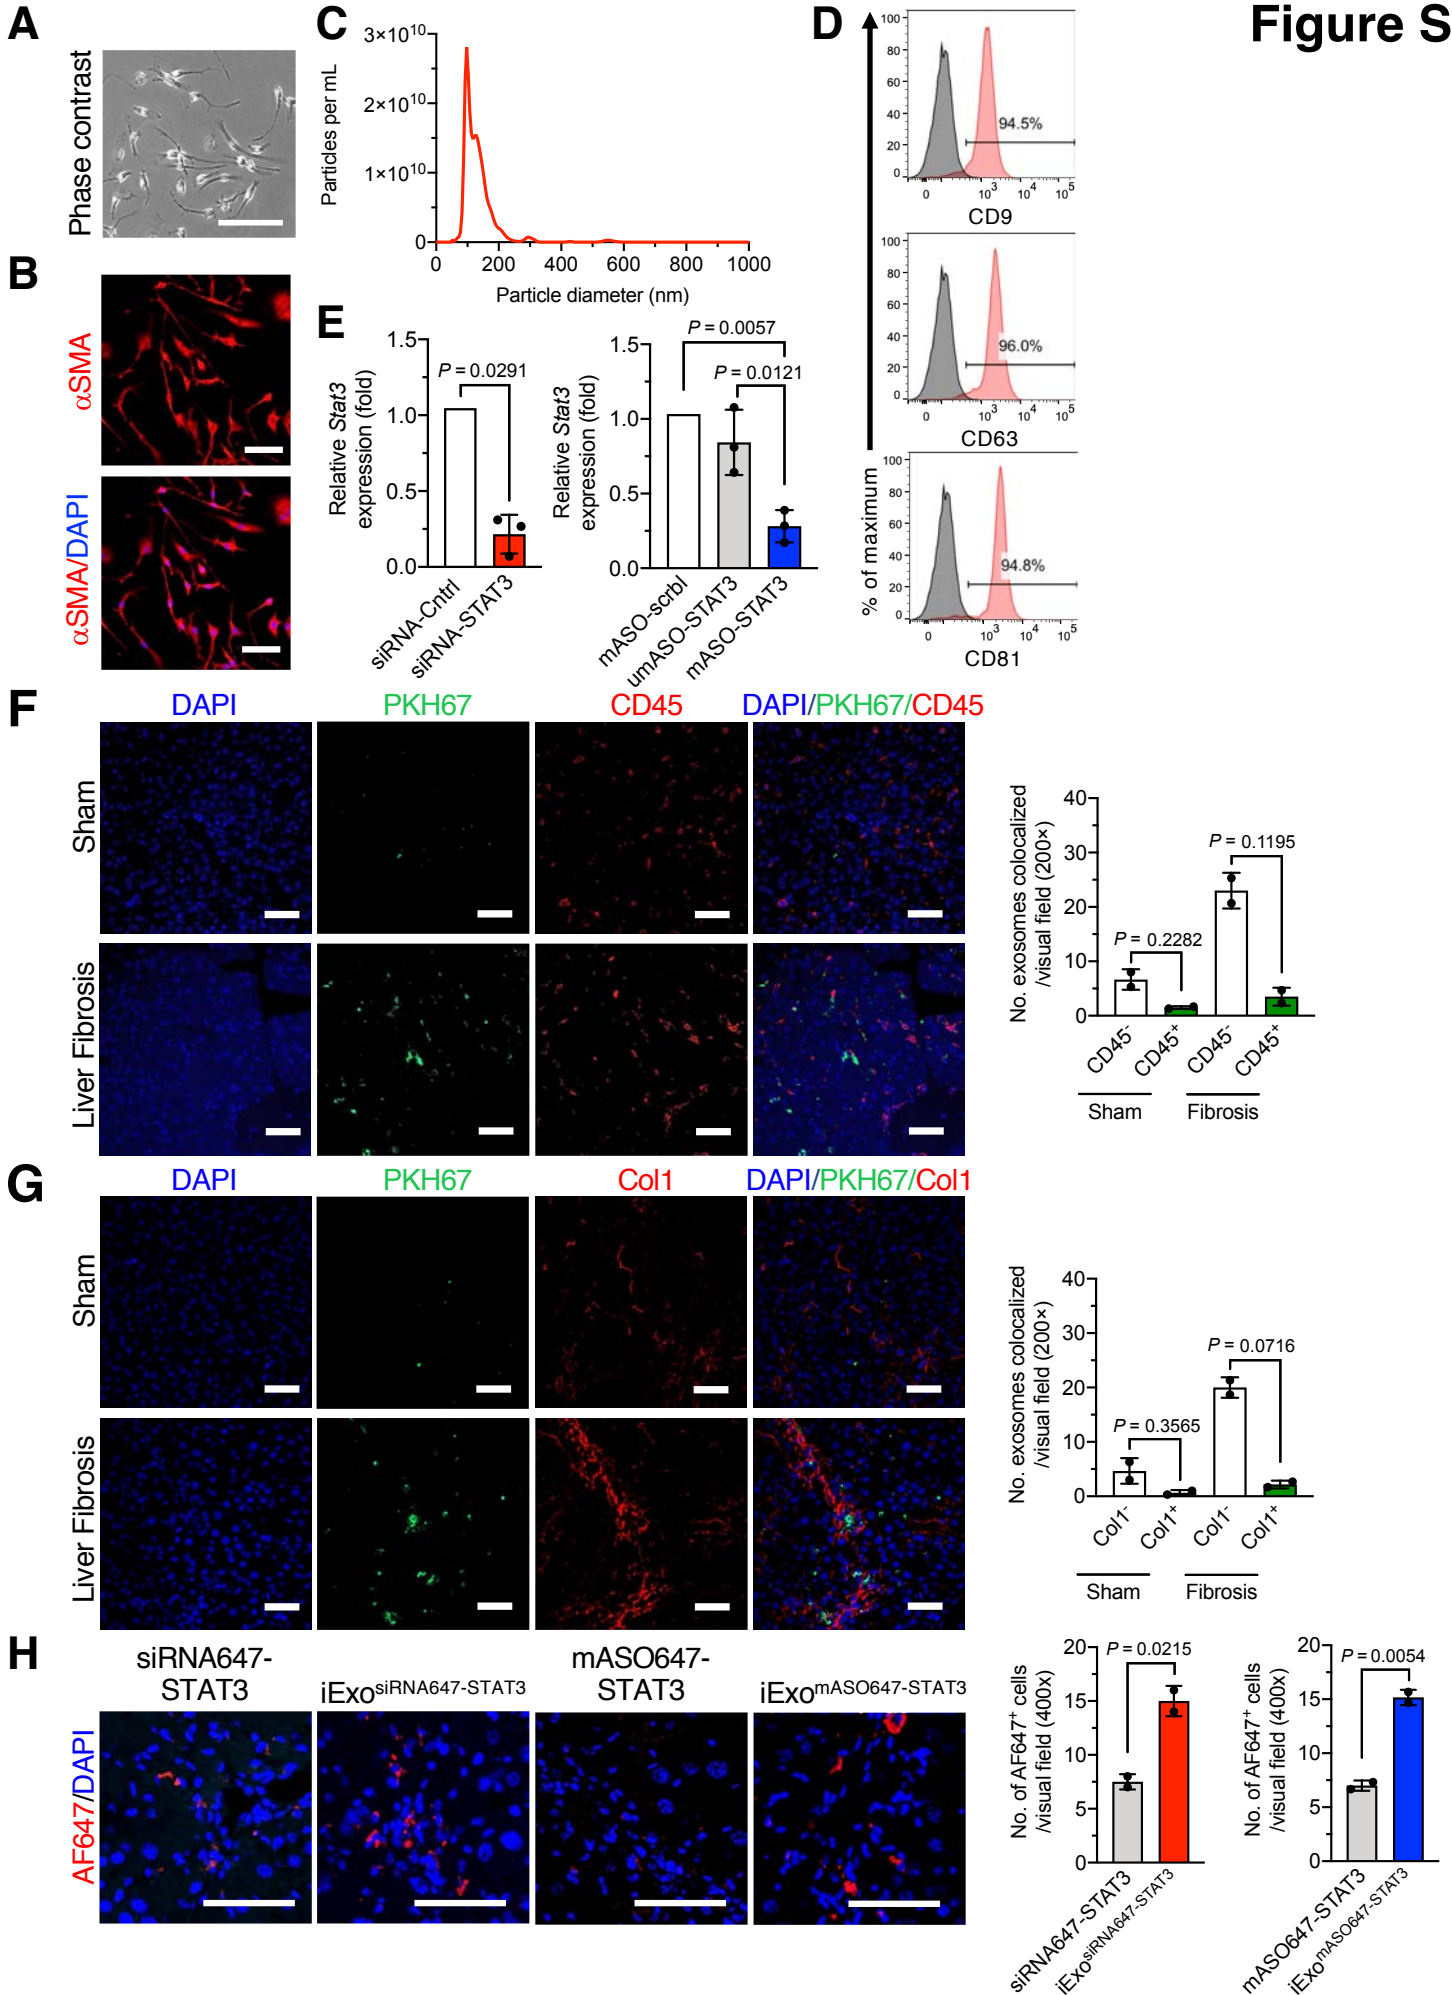



# Figure S3

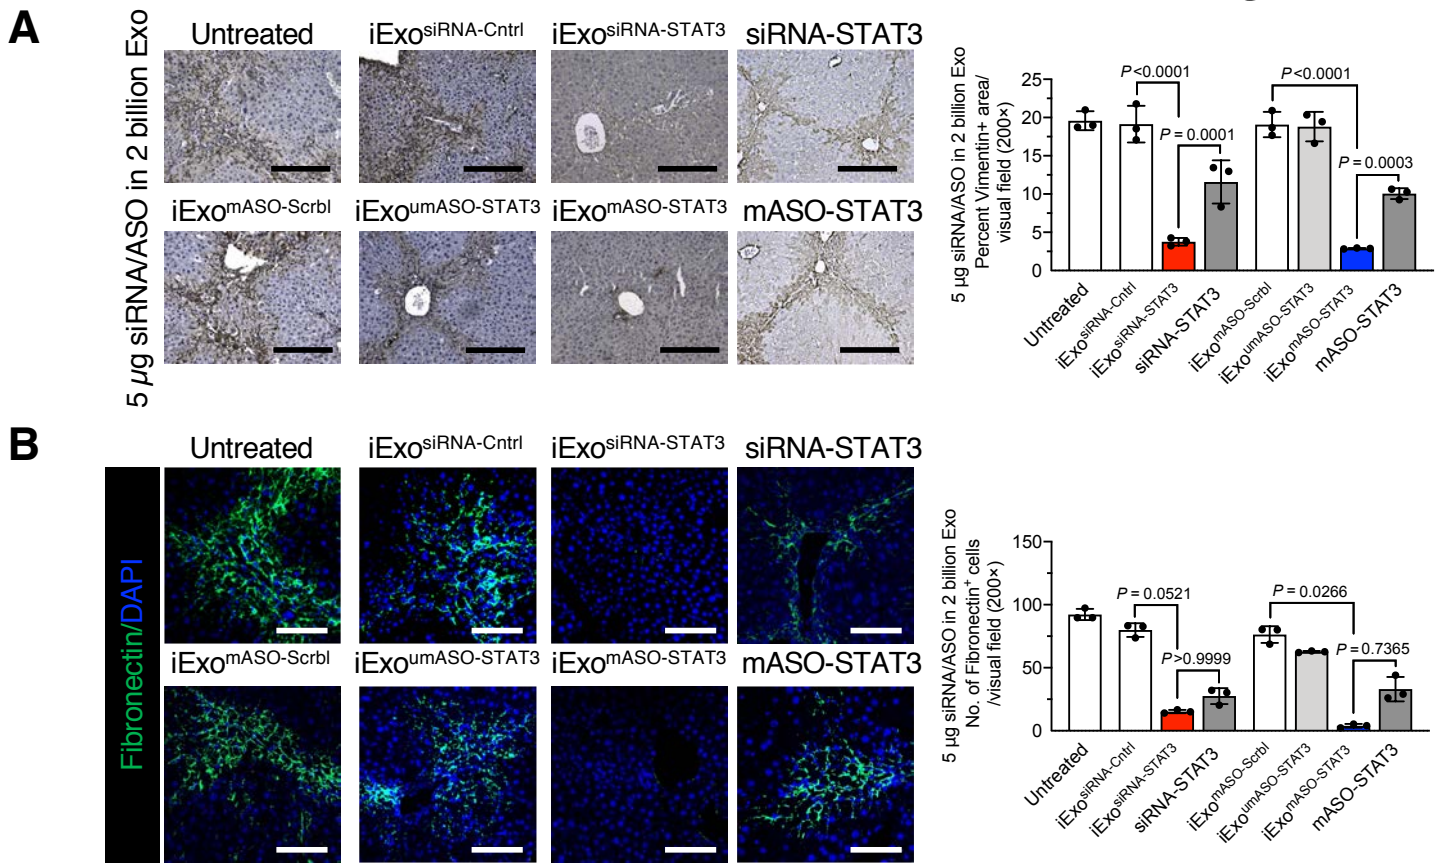



Figure S4

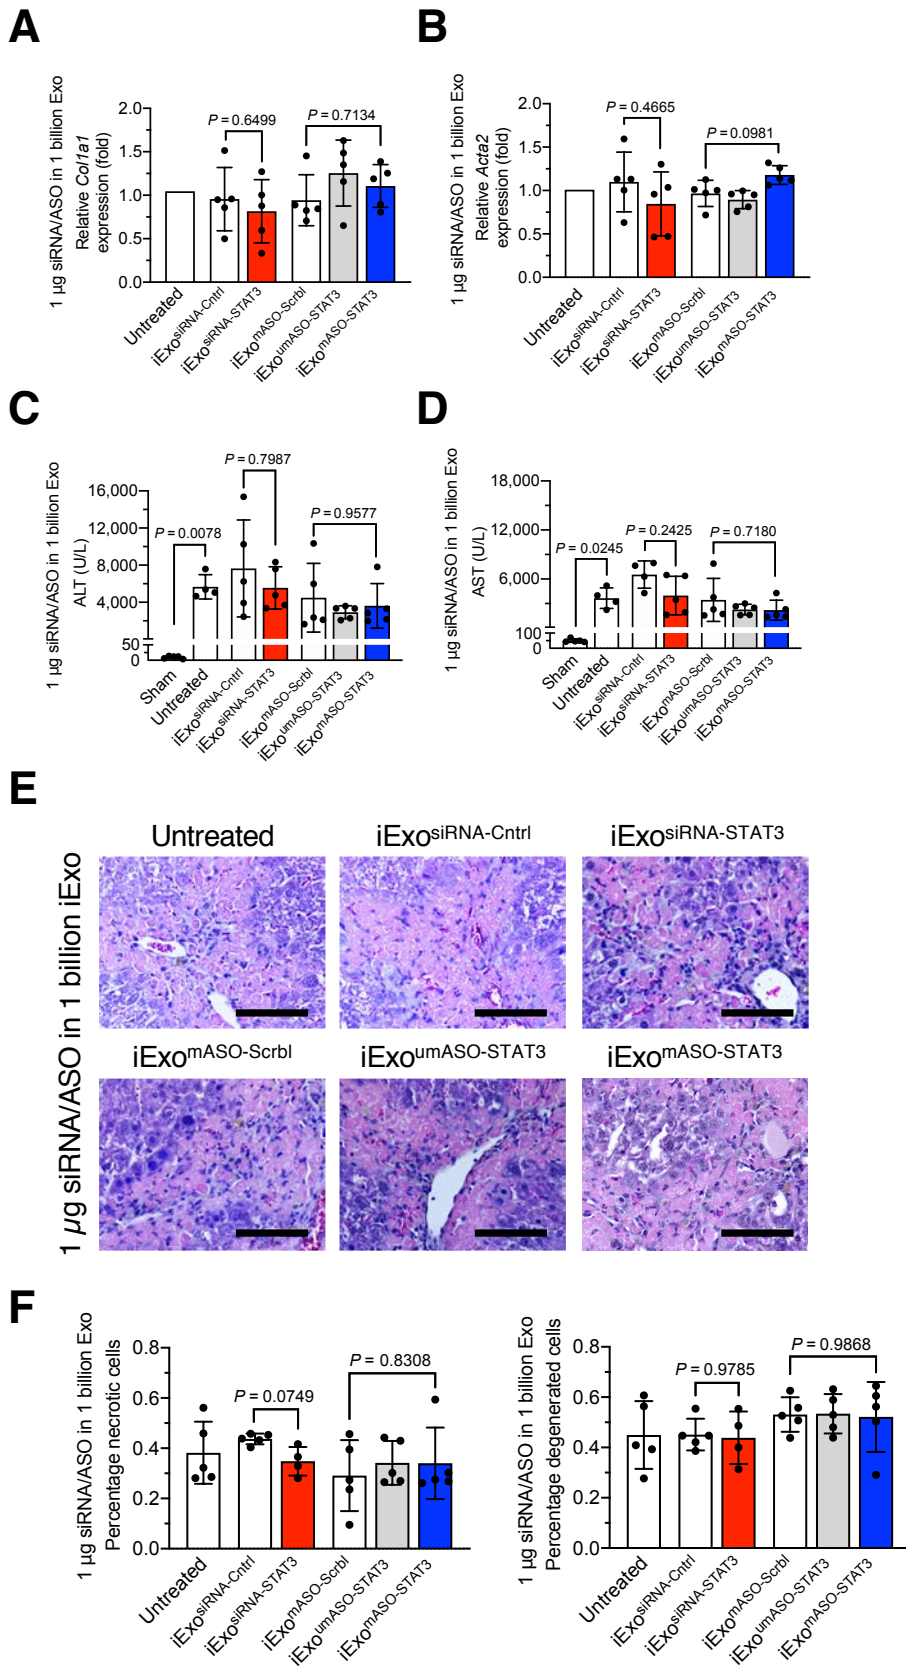

**Figure S5**

**A**

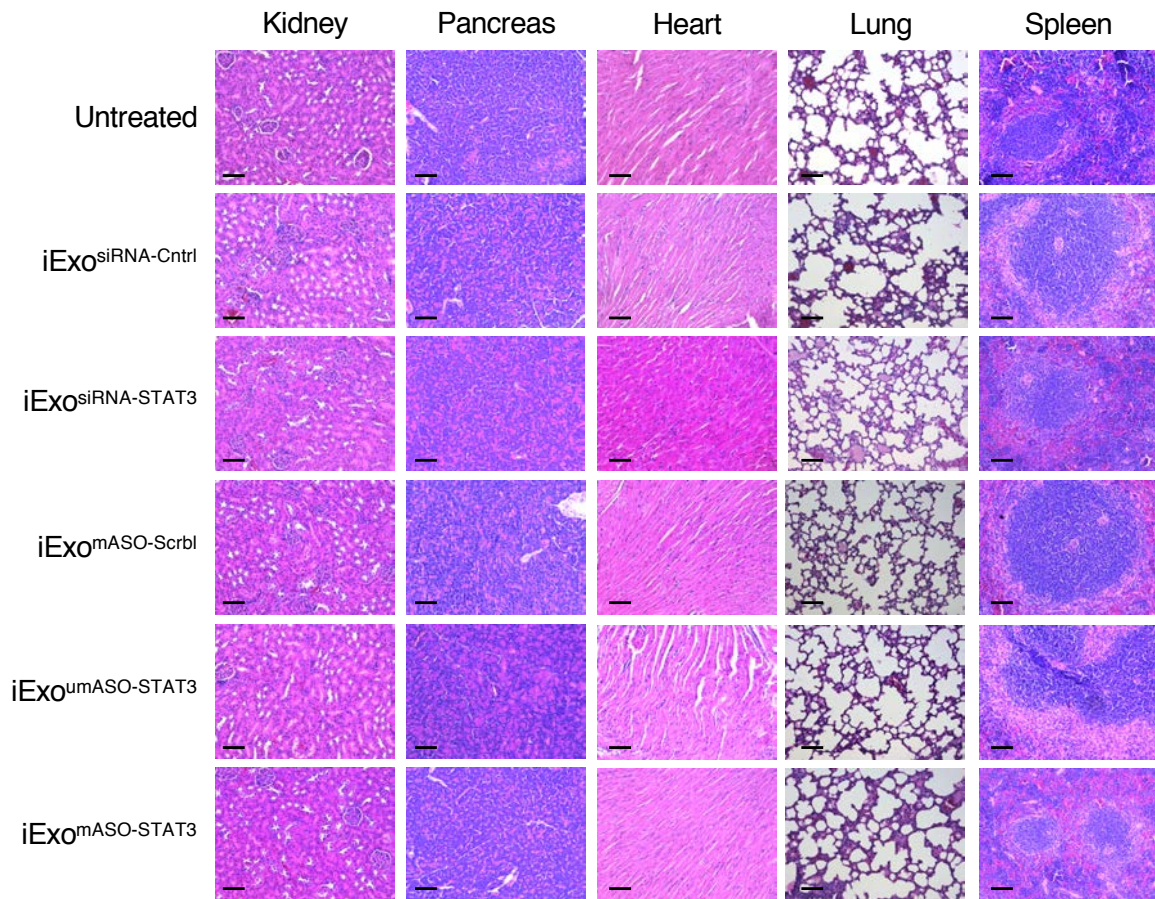

**B**

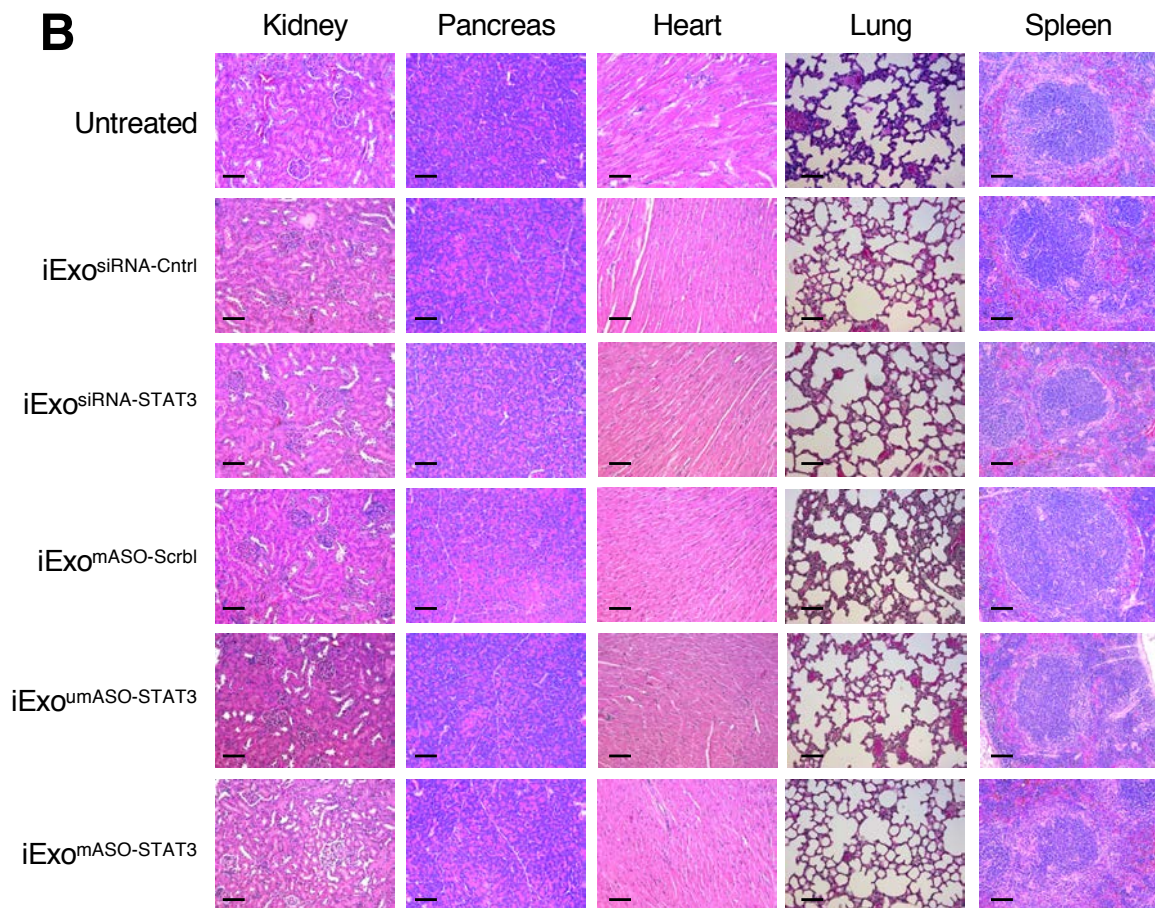

Supplement: NIHMS1901572-supplement-Supplementary_figures.pdf [file NIHMS1901572-supplement-Supplementary_figures.pdf]
